# Supplementary material for: Exploring general-purpose protein features for distinguishing enzymes and non-enzymes within the twilight zone
Source: PubMed Central journal article supplement (PMC5521120; doi:10.1186/s12859-017-1758-x), 2017-07-21
Supplement: 12859_2017_1758_MOESM2_ESM.pdf [file 12859_2017_1758_MOESM2_ESM.pdf]

## Additional File-2

### Figures

- **Figure SI-1.** Dot plot of the pairwise amino acid identity matrix expressed in percentage (colour bar) for the D&D dataset. (A) Global *all-vs-all* sequence alignments using the Needleman-Wunsch (NW) algorithm (B) Local *all-vs-all* sequence alignments using the Smith-Waterman (SW) algorithm.
- **Figure SI-2.** Structural diversity summary of the D&D dataset according to SCOP database.

### Tables

- **Table SI-1.** Compendium of structural and chemical-physical amino acid properties.
- **Table SI-2.** Formulae and description of Thermodynamics Indices for Protein Sequences.
- **Table SI-3.** Formulae and description of Topographic Indices.
- **Table SI-4.** Formulae and description of 3D-Thermodynamics Indices.
- **Table SI-5.** Summary of the definitions of amino acid groups.
- **Table SI-6.** Aggregation operators: Norms (Metrics) Invariants.
- **Table SI-7.** Aggregation operators: Mean (First Statistical Moment) Invariants.
- **Table SI-8.** Aggregation operators: Statistical (Highest Statistical Moments) Invariants.
- **Table SI-9.** Aggregation operators: Information-Theory-based Invariants.
- **Table SI-10.** Structural diversity summary of the D&D enzyme subset according to SCOP hierarchal database.
- **Table SI-11.** Structural diversity summary of the D&D enzyme subset according to SCOP hierarchal database.
- **Table SI-12.** Structural information of the selected ProtDCal's features from the different families of descriptors (0D, 1D & 3D)
- **Table SI-13.** Detailed information about the benchmark annotation dataset and the prediction performed for each method/protein. Misclassified cases are highlighted in red font

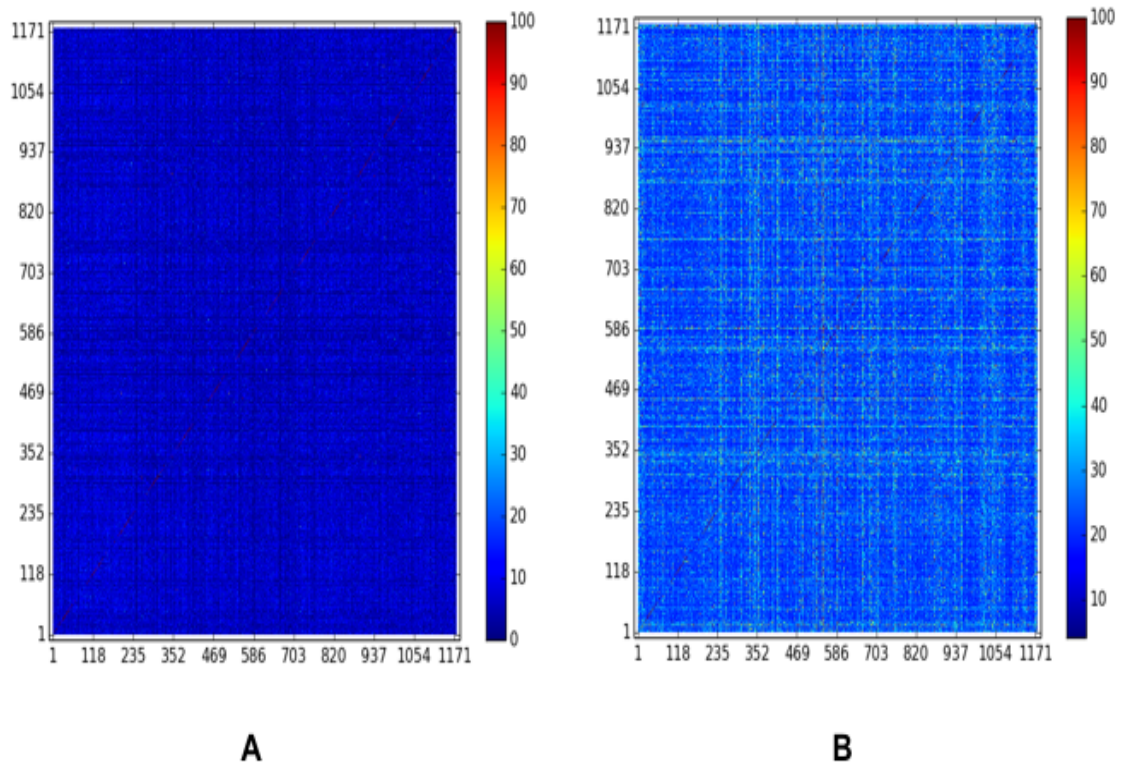

**Figure SI-1.** Dot plot of the pairwise identity matrix expressed in percentage (colour bar) for the D&D dataset. (A) Global *all-vs-all* sequence alignments using the Needleman-Wunsch (NW) algorithm (B) Local *all-vs-all* sequence alignments using the Smith-Waterman (SW) algorithm.

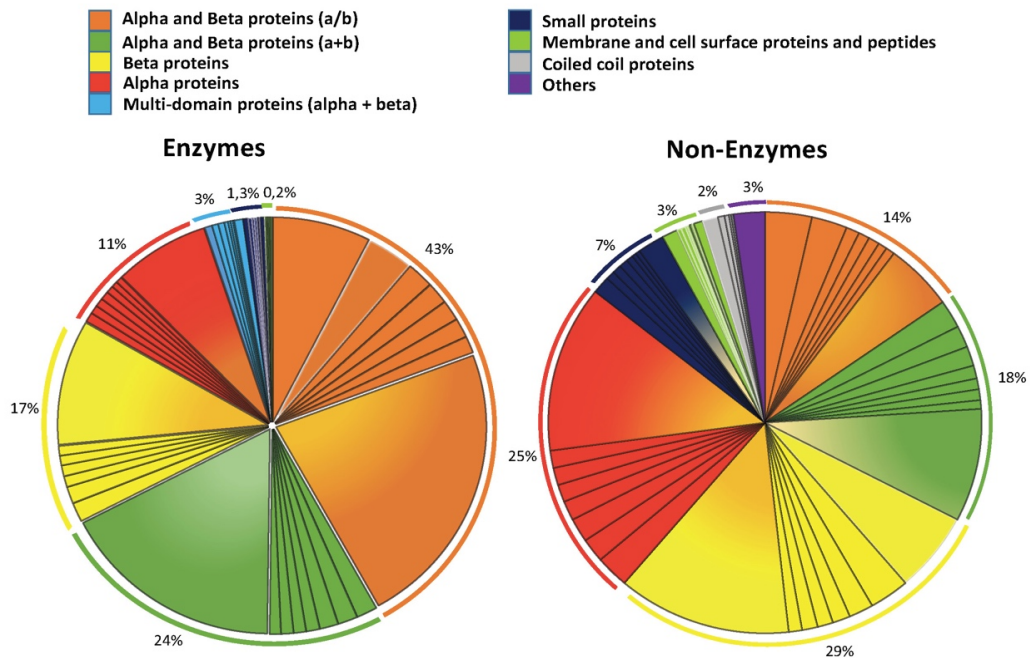

**Figure SI-2.** Structural diversity summary of the D&D dataset according to SCOP database. Main structural classes are labelled using the assigned colours in the legend. Each class is subdivided by lines into subsections corresponding to the structural folds. Graph subsections (Folds) represented by colour gradients are made up of several fold types. These subsections are termed as “others”. The information provided in the figure is complemented with the data shown in supplementary tables SI-1 and SI-2.

**Table SI-1.** Compendium of structural and chemical-physical amino acid properties.

|            | <b>Mw</b>                                                      | <b>HP</b> | <b>IP</b> | <b>ECI</b> | <b>ISA</b> | <b>Z1</b> | <b>Z2</b> | <b>Z3</b> | <b>Pb</b> | <b>Pt</b> | <b>Pa</b> |
|------------|----------------------------------------------------------------|-----------|-----------|------------|------------|-----------|-----------|-----------|-----------|-----------|-----------|
| <b>ALA</b> | 71                                                             | 1.8       | 6.01      | 0.05       | 62.9       | 0.07      | -1.73     | 0.09      | 0.9       | 0.78      | 1.29      |
| <b>ARG</b> | 156                                                            | -4.5      | 10.76     | 1.69       | 52.98      | 2.88      | 2.52      | -3.44     | 0.99      | 0.88      | 0.96      |
| <b>ASN</b> | 114                                                            | -3.5      | 5.41      | 1.31       | 17.87      | 3.22      | 1.45      | 0.84      | 0.76      | 1.28      | 0.9       |
| <b>ASP</b> | 115                                                            | -3.5      | 2.77      | 1.25       | 18.46      | 3.64      | 1.13      | 2.36      | 0.72      | 1.41      | 1.04      |
| <b>CYS</b> | 103                                                            | 2.5       | 5.07      | 0.15       | 78.51      | 0.71      | -0.97     | 4.13      | 0.74      | 0.8       | 1.11      |
| <b>GLN</b> | 128                                                            | -3.5      | 3.22      | 1.31       | 19.53      | 3.08      | 0.39      | -0.07     | 0.75      | 1         | 1.44      |
| <b>GLU</b> | 129                                                            | -3.5      | 5.65      | 1.36       | 30.19      | 2.18      | 0.53      | -1.14     | 0.8       | 0.97      | 1.27      |
| <b>GLY</b> | 57                                                             | -0.4      | 5.97      | 0.02       | 19.93      | 2.23      | -5.36     | 0.3       | 0.92      | 1.64      | 0.56      |
| <b>HIS</b> | 137                                                            | -3.2      | 7.59      | 0.56       | 87.38      | 2.41      | 1.74      | 1.11      | 1.08      | 0.69      | 1.22      |
| <b>ILE</b> | 113                                                            | 4.5       | 6.02      | 0.09       | 149.77     | -4.44     | -1.68     | -1.03     | 1.45      | 0.51      | 0.97      |
| <b>LEU</b> | 113                                                            | 3.8       | 5.98      | 0.01       | 154.35     | -4.19     | -1.03     | -0.98     | 1.02      | 0.59      | 1.3       |
| <b>LYS</b> | 128                                                            | -3.9      | 9.74      | 0.53       | 102.78     | 2.84      | 1.41      | -3.14     | 0.77      | 0.96      | 1.23      |
| <b>MET</b> | 131                                                            | 1.9       | 5.74      | 0.34       | 132.22     | -2.49     | -0.27     | -0.41     | 0.97      | 0.39      | 1.47      |
| <b>PHE</b> | 147                                                            | 2.8       | 5.48      | 0.14       | 189.42     | -4.92     | 1.3       | 0.45      | 1.32      | 0.58      | 1.07      |
| <b>PRO</b> | 97                                                             | -1.6      | 6.48      | 0.16       | 122.35     | -1.22     | 0.88      | 2.23      | 0.64      | 1.91      | 0.52      |
| <b>SER</b> | 87                                                             | -0.8      | 5.68      | 0.56       | 19.75      | 1.96      | -1.63     | 0.57      | 0.95      | 1.33      | 0.82      |
| <b>THR</b> | 101                                                            | -0.7      | 5.87      | 0.65       | 59.44      | 0.92      | -2.09     | -1.4      | 1.21      | 1.03      | 0.82      |
| <b>TRP</b> | 186                                                            | -0.9      | 5.89      | 1.08       | 179.16     | -4.75     | 3.65      | 0.85      | 1.14      | 0.75      | 0.99      |
| <b>TYR</b> | 163                                                            | -1.3      | 5.66      | 0.72       | 132.16     | -1.39     | 2.32      | 0.01      | 1.25      | 1.05      | 0.72      |
| <b>VAL</b> | 99                                                             | 4.2       | 5.97      | 0.07       | 120.91     | -2.69     | -2.53     | -1.29     | 1.49      | 0.47      | 0.91      |
|            |                                                                |           |           |            |            |           |           |           |           |           |           |
| <b>Mw</b>  | Molar Weight (12)                                              |           |           |            |            |           |           |           |           |           |           |
| <b>HP</b>  | Kyte-Doolittle's Hydrophobicity Scale (5)                      |           |           |            |            |           |           |           |           |           |           |
| <b>IP</b>  | Isoelectric Point (12)                                         |           |           |            |            |           |           |           |           |           |           |
| <b>ECI</b> | Electronic Charge Index (6)                                    |           |           |            |            |           |           |           |           |           |           |
| <b>Z1</b>  | Composed parameter related with hydrophilicity (14)            |           |           |            |            |           |           |           |           |           |           |
| <b>Z2</b>  | Composed parameter related with steric features (14)           |           |           |            |            |           |           |           |           |           |           |
| <b>Z3</b>  | Composed parameter related with electronic features (14)       |           |           |            |            |           |           |           |           |           |           |
| <b>ISA</b> | Isotropic Surface Area (6)                                     |           |           |            |            |           |           |           |           |           |           |
| <b>Pa</b>  | Levitt's Probability of adopting alpha helix conformation (15) |           |           |            |            |           |           |           |           |           |           |
| <b>Pb</b>  | Levitt's Probability of adopting beta sheet conformation (15)  |           |           |            |            |           |           |           |           |           |           |
| <b>Pt</b>  | Levitt's Probability of adopting beta turn conformation (15)   |           |           |            |            |           |           |           |           |           |           |

**Table SI-2.** Formulae and description of Thermodynamics Indices for Protein Sequences.

| <b>Acronym</b> | <b>Formula</b>                                            | <b>Description</b>                                                                                        |
|----------------|-----------------------------------------------------------|-----------------------------------------------------------------------------------------------------------|
| W(U)           | $W_i^U = \prod_{j=i-2}^{i+2} N_j^w$                       | Number of water molecules close to a residue in an unfolded state (3).                                    |
| Gw(U)          | $G_w(U)_i = TR_{hyd} \ln \frac{W_i^U!}{(W_i^U - N_i^w)!}$ | Free energy contribution from the entropy of the first shell of water molecules in an unfolded state (3). |
| Gs(U)          | $G_s(U)_i = H_i A_i^U$                                    | Interfacial free energy contribution of an unfolded state                                                 |

**Table SI-3.** Formulae and description of 3D-structure indices.

| Acronym         | Formula                                                                                                                                                                                                                                        | Description                                                                                                                                                                                                                                                                                                                                                                                                                                                                                                                                                                     |
|-----------------|------------------------------------------------------------------------------------------------------------------------------------------------------------------------------------------------------------------------------------------------|---------------------------------------------------------------------------------------------------------------------------------------------------------------------------------------------------------------------------------------------------------------------------------------------------------------------------------------------------------------------------------------------------------------------------------------------------------------------------------------------------------------------------------------------------------------------------------|
| $A_F$           | -                                                                                                                                                                                                                                              | Solvent accessible surface area                                                                                                                                                                                                                                                                                                                                                                                                                                                                                                                                                 |
| $\Delta A$      | $\Delta A = A_F - A_U$                                                                                                                                                                                                                         | Buried area. Where $A_U$ is the fully exposed surface area of each residue and $A_F$ is the area in the folded state.                                                                                                                                                                                                                                                                                                                                                                                                                                                           |
| $\Delta A^{np}$ | $\Delta A^{np} = A^{np}_F - A^{np}_U$                                                                                                                                                                                                          | Buried non-polar area. Here nitrogen atoms and oxygen atoms are excluded.                                                                                                                                                                                                                                                                                                                                                                                                                                                                                                       |
| wSp             | $wSp_i = \omega_i * \delta_i^s$                                                                                                                                                                                                                | Weighted index of the solvent accessibility. Where $\omega$ represents any weighting property and the delta takes value 1 or 0 if the residue is considered superficial or internal respectively.                                                                                                                                                                                                                                                                                                                                                                               |
| lnFD            | $lnFD_i = \frac{\sum_{j: j-i >1}^N  j-i /d_{ij}^3}{N * x}$                                                                                                                                                                                     | Logarithm of the Folding Degree. Where $d$ is the spatial distance, $N$ the length of the protein and $x$ a parameter which takes value 2 for terminal residues and 3 for the others.                                                                                                                                                                                                                                                                                                                                                                                           |
| wR <sup>2</sup> | $wRG_i^2 = \frac{\sum_{i=1}^N \omega_i * d_i^2}{\sum_{i=1}^N \omega_i}$                                                                                                                                                                        | Weighted Squared Radius. Where $\omega$ represents any weighting property and $d$ is the spatial distance.                                                                                                                                                                                                                                                                                                                                                                                                                                                                      |
| w $\Delta$ HBd  | $Hbd_i = \omega_i * (N + o)$<br>Geometric definition of a H-bond:<br>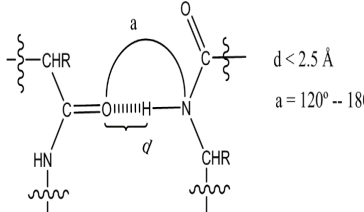 <p><math>d &lt; 2.5 \text{ \AA}</math><br/> <math>a = 120^\circ - 180^\circ</math></p> | Weighted deficit or excess of the H-bond between the backbone atoms. Where $\omega_{ij}^N$ takes value 1 if the nitrogen atom of residue $i$ is buried ( $A_{(N)} < 0.01 \text{ \AA}$ ) and is not H-bonded with any oxygen atom or 0 otherwise. In the same way $\omega_{ij}^O$ takes value 1 if the oxygen atom of residue $i$ is buried ( $A_{(O)} < 0.01 \text{ \AA}$ ) and is not H-bonded with any nitrogen atom and 0 otherwise.                                                                                                                                         |
| wNc             | $wNc_i = 0.5 \sum_{j=1}^N \delta_{ij}^c$                                                                                                                                                                                                       | Weighted Number of Contact. Where $\delta_{ij}$ takes value 1 when the contact conditions are fulfilled and 0 otherwise. A contacts is defined for pair of residues with spatial distances shorter than a cutoff $d$ and topological distances longer than a cutoff $t$ . The parameter $\omega_{ij}$ represents a weighting coefficient for each pair of residues. This parameter is computed as the product, $\omega_i \omega_j$ , of the values, for each residue, of any property within a pool of 12 aminoacid properties covering structural, physical-chemical features. |
| wFLC            | $wFLC_i = \frac{\sum_{j=1}^N \delta_{ij}^c}{N * \sum_{j=1}^N \omega_{ij}^c}$                                                                                                                                                                   | Weighted Fraction of Local Contancts. The parameters $\delta_{ij}$ and $\omega_{ij}$ means the same as previous but here the topological cutoff value is fixed in $t = 1$ .                                                                                                                                                                                                                                                                                                                                                                                                     |
| wNLC            | $wNLC_i = 0.5 \sum_{ j-i  \leq 4}^N \delta_{ij}^c$                                                                                                                                                                                             | Weighted Number of Local Contact The parameters $\delta_{ij}$ and $\omega_{ij}$ means the same as in $wNc$ but here the topological cutoff value is fixed in $t = 1$ .                                                                                                                                                                                                                                                                                                                                                                                                          |
| wCO             | $wCO_i = \frac{1}{2NN_c} \sum_{j=1}^N \delta_{ij}^c$                                                                                                                                                                                           | Weighted Relative Contact Order (7). Where $Nc$ represents the number of contacts in the protein.                                                                                                                                                                                                                                                                                                                                                                                                                                                                               |

|        |                                                                                                                     |                                                                                                                                                                               |
|--------|---------------------------------------------------------------------------------------------------------------------|-------------------------------------------------------------------------------------------------------------------------------------------------------------------------------|
| wLCO   | $wLCO_i = \frac{\sum_{j=1}^N \sum_{i=1}^c \sum_{ij}^c}{N \sum_{j=1}^N \sum_{ij}^c}$                                 | Weighted Local Contact Order. As difference with previous, the weighted contacts are divided by the same un-weighted local contact instead of all the contact in the protein. |
| wRWCO  | $wRWCO_i = \frac{\sum_{j=1}^N \sum_{ij}^c}{N}$                                                                      | Weighted Residue-Wise Contact Order (8).                                                                                                                                      |
| wCTP   | $wCTP_i = \frac{1}{2NN_c} \sum_{j=1}^N \sum_{ij}^2 \sum_{ij}^c$                                                     | Weighted Chain Topology Parameter (9).                                                                                                                                        |
| wCLQ   | $wCLQ_i = \frac{\sum_{j<l} \sum_{ij}^{il} \sum_{lj}^{ij} \sum_{il}^{lj}}{\sum_{j<l} \sum_{ij}^{il} \sum_{ij}^{il}}$ | Weighted Cliquishness or Clustering Coefficient (10).                                                                                                                         |
| wPsi_H | $Psi\_H_i = \delta_i^H * \delta_i$                                                                                  | Weighted Helix-like Psi angle. The delta takes value 1 if the angle is in the range [-77;-17] or 0 otherwise.                                                                 |
| wPsi_S | $Psi\_S_i = \delta_i^S * \delta_i$                                                                                  | Weighted Sheet-like Psi angle. The delta takes value 1 if the angle is in the range [94;154] or 0 otherwise.                                                                  |
| wPsi_I | $Psi\_I_i = \delta_i^I * \delta_i$                                                                                  | Weighted Irregular Psi angle. The delta takes value 1 if the angle is in one of the following ranges: [-180,-77), (-17;94), (154;180] or 0 otherwise.                         |
| wPhi_H | $Phi\_H_i = \delta_i^H * \delta_i$                                                                                  | Weighted Helix like Phi angle. The delta takes value 1 if the angle is in the range [-87;-27] or 0 otherwise.                                                                 |
| wPhi_S | $Phi\_S_i = \delta_i^S * \delta_i$                                                                                  | Weighted Sheet like Phi angle. The delta takes value 1 if the angle is in the range [-159;-99] or 0 otherwise.                                                                |
| wPhi_I | $Phi\_I_i = \delta_i^I * \delta_i$                                                                                  | Weighted Irregular Phi angle. The delta takes value 1 if the angle is in one of the following ranges: [-180,-159), (-99;-87), (-27;180] or 0 otherwise.                       |
| Phi    | -                                                                                                                   | Phi diedral angle                                                                                                                                                             |
| Psi    | -                                                                                                                   | Psi diedral angle                                                                                                                                                             |
| TCD    | $wTCD_i = \frac{1}{2N^2} \sum_{j=1}^N \sum_{ij}^c \sum_{ij}^c$                                                      | Total Contact Distance (11).                                                                                                                                                  |

**Table SI-4.** Formulae and description of 3D-Thermodynamics Indices.

| Acronym           | Formula                                                                                                                                                                                                                                                                                     | Description                                                                                                                                                                                                                                                                                                                                                                                                                                                                    |
|-------------------|---------------------------------------------------------------------------------------------------------------------------------------------------------------------------------------------------------------------------------------------------------------------------------------------|--------------------------------------------------------------------------------------------------------------------------------------------------------------------------------------------------------------------------------------------------------------------------------------------------------------------------------------------------------------------------------------------------------------------------------------------------------------------------------|
| G <sub>c(F)</sub> | $G_c(F)_i = RT(N-1)p_i \ln p_i,$ $p_i = \frac{3}{2(i-1)3.8^2} e^{-\frac{3r_i^2}{2(i-1)3.8^2}}$                                                                                                                                                                                              | Configurational free energy of a folded state. Index based on a “random-flight” model of the protein chain. (1)<br>Where $r_i$ represents the distance to the first residue in the chain.                                                                                                                                                                                                                                                                                      |
| W <sub>(F)</sub>  | $W_i^F = \prod_{j=1}^N \delta_{ij}^{ng} \delta_j^s N_j^w$                                                                                                                                                                                                                                   | Number of water molecules close to a residue in a folded state.(2,3)<br>Where $\delta^{ng}$ takes value 1 if the pair of residues are neighbours, using a cutoff for the spatial distance (9.4 Å), or 0 otherwise. In the same way $\delta^s$ takes value 1 if the residue is superficial, using a cutoff for the solvent accessible surface area, or 0 otherwise. The parameters $N^w$ represents the number of associated water molecules to the sidechain of a residue (4). |
| G <sub>w(F)</sub> | $G_w(F)_i = TR_{hyd} \ln \frac{W_i^F!}{(W_i^F N_i^w)!}$                                                                                                                                                                                                                                     | Free energy contribution of the entropy of the first shell of water molecules in a folded state (3). $\delta_{hyd}$ takes value 1 if the residue has non-zero $N_i^w$ , or zero otherwise.                                                                                                                                                                                                                                                                                     |
| G <sub>s(F)</sub> | $G_s(F)_i = H_i A_i^F$                                                                                                                                                                                                                                                                      | Interfacial free energy contribution of a folded state. Where $H_i$ is hydrophobicity in Kyte-Doolittle scale (5) and $A^F$ is the solvent accessible surface area of a residue in a folded state.                                                                                                                                                                                                                                                                             |
| $\Delta G_s$      | $G_{s_i} = G_s(F)_i - G_s(U)_i$                                                                                                                                                                                                                                                             | Interfacial free energy variation.                                                                                                                                                                                                                                                                                                                                                                                                                                             |
| HBd               | $Hbd_i = 0.5 \prod_{j=1}^N \left( \delta_{ij}^N + \delta_{ij}^O \right)$ <p>Geometric definition of a H-bond:</p> 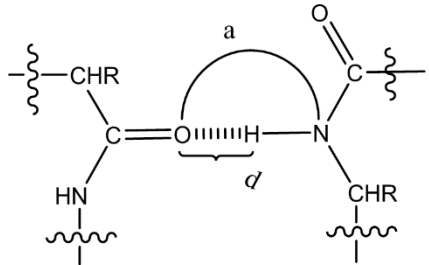 <p><math>d &lt; 2.5 \text{ \AA}</math><br/><math>a = 120^\circ - 180^\circ</math></p> | Number of backbone's hydrogen bonds.<br>Where $\delta_{ij}^N$ takes value 1 if the Nitrogen atom of residue $i$ is H-bonded with the Oxygen atom of residue $j$ and 0 otherwise. In the same way $\delta_{ij}^O$ takes value one if the Oxygen atom of residue $i$ is H-bonded with the Nitrogen atom of residue $j$ and zero otherwise.                                                                                                                                       |



|                  |                                                                                                                                             |                                                                                                                                                                                |
|------------------|---------------------------------------------------------------------------------------------------------------------------------------------|--------------------------------------------------------------------------------------------------------------------------------------------------------------------------------|
| $\Delta G_{el}$  | $G_{el\ i} = \frac{k_{el}}{2} \sum_{j=1}^N \frac{q_i q_j r_i r_j}{r_{ij}}$                                                                  | Free energy contribution of the charge distribution within the protein. The parameters $q$ are the Electronic Charge Indices of each residue (6). Parameter $k_{el} = 7.608$ . |
| $\Delta G_w$     | $G_w = k_w (G_w(F)_i - G_w(U)_i)$                                                                                                           | Folding free energy contribution of the entropy of the first shell of water molecules.                                                                                         |
| $\Delta G_{LJ}$  | $G_{LJ\ i} = \frac{k_{LJ}}{2} \sum_{\substack{j=1; \\  j-i >1}}^N \left( \frac{3.965^{12}}{r_{ij}^{12}} - \frac{3.965^6}{r_{ij}^6} \right)$ | Residue-level Lennard-Jones interactions. Parameter $k_{LJ} = 63.981$ .                                                                                                        |
| $\Delta G_{tor}$ | $G_{tor\ i} = k_{tor} [(\cos^2 \theta_i - 1) + 0.256(\cos^2 \theta_i - 1)]$                                                                 | Free energy contribution of backbone torsion angles. Parameter $k_{tor} = 1.219$ .                                                                                             |

**Table SI-5.** Summary of the definitions of amino acid groups.

| <b>Acronym</b> | <b>Included Residues</b>                              | <b>Description</b>                      |
|----------------|-------------------------------------------------------|-----------------------------------------|
| <b>AHR</b>     | ALA, CYS, GLN, GLU, HIS, LEU, LYS, MET                | Common residues in alpha helix motifs.  |
| <b>BSR</b>     | ILE, PHE, THR, TRP, TYR, VAL                          | Common residues in beta sheet motifs.   |
| <b>RTR</b>     | ASN, ASP, GLY, PRO, SER                               | Common residues in reverse turn motifs. |
| <b>PCR</b>     | ARG, HIS, LYS                                         | Positive-charged residues.              |
| <b>NCR</b>     | ASP, GLU                                              | Negative-charged residues.              |
| <b>UCR</b>     | ASN, CYS, GLN, SER, THR, TYR                          | Polar non-charged residues.             |
| <b>ARM</b>     | HIS, PHE, TRP, TYR                                    | Aromatic residues.                      |
| <b>ALR</b>     | ALA, GLY, ILE, LEU, MET, PRO, VAL                     | Aliphatic residues.                     |
| <b>UFR</b>     | GLY, PRO                                              | Common unfolding-promoter residues      |
| <b>NPR</b>     | ALA, GLY, ILE, LEU, MET, PHE, PRO, TRP, VAL           | Non-polar residues.                     |
| <b>PLR</b>     | ARG, ASN, ASP, CYS, GLN, GLU, HIS, LYS, SER, THR, TYR | Polar residues.                         |

**Table SI-6.** Aggregation operators: p-norms.

| Acronym | Formula                            | Description                                                                                                                                   |
|---------|------------------------------------|-----------------------------------------------------------------------------------------------------------------------------------------------|
| N1      | $N1 = \sum_{i=1}^N  L_i $          | Minkowski's norms (p = 1) Manhattan norm. Where $L_i$ represents each index of the group of indices and N the number of indices in the group. |
| N2      | $N2 = \sqrt{\sum_{i=1}^N  L_i ^2}$ | Minkowski's norms (p = 2) Euclidean norm. Where $L_i$ represents each index of the group of indices and N the number of indices in the group. |

**Table SI-7.** Aggregation operators: Central tendency measues (First Statistical Moment).

| Acronym | Formula                                                                              | Description                                                       |
|---------|--------------------------------------------------------------------------------------|-------------------------------------------------------------------|
| G       | $G = \sqrt[N]{\prod_{i=1}^N L_i}$                                                    | Geometric Mean.<br>Where N is the number of indices in the group. |
| M       | $m_\alpha = \frac{L_1^\alpha + L_2^\alpha + \dots + L_N^\alpha}{N} \frac{1}{\alpha}$ | Arithmetic Mean<br>(potential with $\alpha = 1$ )                 |
| P2      |                                                                                      | Quadratic Mean<br>(potential with $\alpha = 2$ )                  |
| A       |                                                                                      | Harmonic Mean<br>(potential with $\alpha = -1$ )                  |

**Table SI-8** Aggregation operators: Dispersion and distribution measures (Highest Statistical Moments).

| Acronym | Formula                                                                                                    | Description                                                                                                                                    |
|---------|------------------------------------------------------------------------------------------------------------|------------------------------------------------------------------------------------------------------------------------------------------------|
| V       | $V = \frac{\sum_{i=1}^N (L_i - \bar{L})^2}{N-1}$                                                           | Variance.<br>Where N is the number of indices in the group.                                                                                    |
| S       | $S = \frac{N(X_3)}{(N-1)(N-2)(DE)^3}$<br>$X_3 = \sum_{a=1}^N (L_a - \bar{L})^3$                            | Skewness.<br>Where N is the number of indices in the group and (DE) <sup>3</sup> is the standard deviation raised to the 3 <sup>rd</sup> power |
| K       | $k = \frac{N(N+1)X_4 - 3(X_2)(X_2)(N-1)}{(N-1)(N-2)(N-3)(DE)^4}$<br>$X_j = \sum_{a=1}^N (L_a - \bar{L})^j$ | Kurtosis.<br>Where (DE) <sup>4</sup> is the standard deviation raised to the fourth power                                                      |
| CV      | $c_v = \frac{s}{\bar{L}}$                                                                                  | Variation Coefficient                                                                                                                          |
| Q1      | $P25 = \frac{N}{4} + \frac{1}{2}$                                                                          | Percentile 25.<br>Where N is the number of indices in the group.                                                                               |
| Q2      | $P50 = \frac{N}{2} + \frac{1}{2}$                                                                          | Percentile 50.<br>Where N is the number of indices in the group.                                                                               |
| Q3      | $P75 = \frac{3N}{4} + \frac{1}{2}$                                                                         | Percentile 75.<br>Where N is the number of indices in the group.                                                                               |
| I50     | $I50 = P75 - P25$                                                                                          | Inter-quartileRange                                                                                                                            |

**Table SI-9.** Aggregation operators: Information-Theory-based measures.

| Acronym | Formula (Equation)                                       | Description                                                                                                                                                                                       |
|---------|----------------------------------------------------------|---------------------------------------------------------------------------------------------------------------------------------------------------------------------------------------------------|
| MI      | $MI = \frac{1}{N} \sum_{k=1}^K N_k \log_2 \frac{N_k}{N}$ | Mean Information Content.<br>Where $N_k$ is the number of indices in the same bin, $K$ is the number of bins defined to compute the operator and $N$ is the total number of indices in the group. |
| TI      | $TI = N \log_2 N - \sum_{k=1}^K N_k \log_2 N_k$          | Total Information Content.                                                                                                                                                                        |
| SI      | $SI = \frac{TI}{N \log_2 N}$                             | Standardized Information Content                                                                                                                                                                  |

**Table SI-10.** Structural diversity summary of the D&D enzyme subset according to SCOP hierarchal database.

| <b>Class</b>                               | <b>Folds</b>                                               | <b>Superfamily/family</b>                                                                                                                                                                                                                                                                                                                                                                                                             |
|--------------------------------------------|------------------------------------------------------------|---------------------------------------------------------------------------------------------------------------------------------------------------------------------------------------------------------------------------------------------------------------------------------------------------------------------------------------------------------------------------------------------------------------------------------------|
| <b>Alpha and beta proteins a/b (372)</b>   | TIM beta/alpha-barrel (80)                                 | <ol style="list-style-type: none"> <li>1. Trans-glycosidases (27)</li> <li>2. FMN-linked Oxidoreductases (8)</li> <li>3. Phosphoenolpyruvate/pyruvate (4)</li> <li>4. Ribulose-phosphate binding (4)</li> <li>5. Other (41)</li> </ol>                                                                                                                                                                                                |
|                                            | NAD(P)-binding Rossmann-fold domains (38)                  | <ol style="list-style-type: none"> <li>1. Tyrosine-dependent oxidoreductase (13)</li> <li>2. Glyceraldehyde-3-phosphatase (6)</li> <li>3. Aminoacid dehydrogenase-I (5)</li> <li>4. 6-phosphogluconate dehydrogenase (5)</li> <li>5. LDH N-terminal domain-like (4)</li> <li>6. Lactate &amp; malate dehydrogenase (4)</li> <li>7. Aminoacid dehydrogenases (3)</li> <li>8. Other (18)</li> </ol>                                     |
|                                            | P-loop containing nucleoside triphosphate hydrolase (22)   | <ol style="list-style-type: none"> <li>1. Nucleotide and nucleoside kinases (8)</li> <li>2. Nitrogenase iron protein (5)</li> <li>3. RecA protein-like (ATPase domain) (3)</li> <li>4. G proteins (2)</li> <li>5. Microbial and mitochondrial ADK (2)</li> <li>6. F1 ATP synthase (2)</li> <li>7. Other (6)</li> </ol>                                                                                                                |
|                                            | alpha/beta-Hidrolases (18)                                 | <ol style="list-style-type: none"> <li>1. Acetylcholinesterase-like (3)</li> <li>2. Fungal lipases (2)</li> <li>3. Cutinase-like (2)</li> <li>4. Haloalkane dehalogenase (2)</li> <li>5. Bacterial lipase (2)</li> <li>6. Porlyl_oligopeptidase (1)</li> <li>7. Haloperoxidase (1)</li> <li>8. Other (6)</li> </ol>                                                                                                                   |
|                                            | Flavodoxin-like a/b/a parallel beta-sheet (17)             | <ol style="list-style-type: none"> <li>1. Class I glutamine amidotransferase like (4)</li> <li>2. NAD(P)-binding Rossmann-fold domains (3)</li> <li>3. Flavoproteins (3)</li> <li>4. Cobalamin (vitamin B12)-binding domain (2)</li> <li>5. Formate/glycerate dehydrogenase (2)</li> <li>6. Glutathione synthetase ATP-binding domain (2)</li> <li>7. Cobalamin (vitamin B12)-dependent enzymes (2)</li> <li>8. Other (10)</li> </ol> |
|                                            | PLP-dependent transferase-like (16)                        | <ol style="list-style-type: none"> <li>1. GABA-aminotransferase-like (6)</li> <li>2. Cystathionine synthase-like (5)</li> <li>3. AAT-like (4)</li> <li>4. Beta-eliminating lyases (1)</li> </ol>                                                                                                                                                                                                                                      |
|                                            | Ribonuclease H-like motif-- a/b/a; mixed beta-sheet (14)   | <ol style="list-style-type: none"> <li>1. Ribonuclease H-like (8)</li> <li>2. Actin-like ATPase domain (4)</li> <li>3. DNA/RNA polymerases (3)</li> <li>4. Creatinase/prolidase (1)</li> <li>5. Methyl transferases... (2)</li> <li>6. Creatinase/aminopeptidase (1)</li> </ol>                                                                                                                                                       |
|                                            | Others (240)                                               | <ol style="list-style-type: none"> <li>1. TIM beta/alpha-barrel (29)</li> <li>2. NAD(P)-binding Rossmann-fold (23)</li> <li>3. FAD/NAD(P)-binding domain (13)</li> <li>4. Nucleotide-diphospho-sugar tranferase (11)</li> <li>5. Thioredoxin fold (10)</li> <li>6. Phosphorylase/hydrolase-like (10)</li> <li>7. S-adenosyl-L-methionine-methyltransferase (9)</li> <li>8. Other (214)</li> </ol>                                     |
| <b>Alpha and beta proteins (a+b) (210)</b> | Protein kinase-like (PK-like), two alpha+beta domains (17) | <ol style="list-style-type: none"> <li>1. Protein kinases (14)</li> <li>2. SH3-domain (2)</li> <li>3. SH2 domain ( Pfam 00017) (2)</li> <li>4. Ras-binding domain (1)</li> <li>5. Phosphoinositide 3-kinase (1)</li> <li>6. MHCK/EF2 kinase (1)</li> <li>7. APH phosphotransferases (1)</li> </ol>                                                                                                                                    |

|                                |                                                                         |                                                                                                                                                                                                                                                                     |
|--------------------------------|-------------------------------------------------------------------------|---------------------------------------------------------------------------------------------------------------------------------------------------------------------------------------------------------------------------------------------------------------------|
|                                |                                                                         | 8. Other (1)                                                                                                                                                                                                                                                        |
|                                | Ferredoxin-like (alpha+beta sandwich with antiparallel beta-sheet) (16) | 1. RuBisCo, C-terminal domain (2)<br>2. 4Fe-4S ferredoxins (2)<br>3. RuBisCO, N-terminal domain (2)<br>4. Nitrite/Sulfite reductase (1)<br>5. Anticodon-binding domain of PheRS (1)<br>6. GHMP Kinase (1)<br>7. Nucleic acid-binding protein (1)<br>8. Other (15)   |
|                                | TIM beta/alpha-barrel (15)                                              | 1. Enolase C-terminal domain (4)<br>2. (Trans)glycosidases (4)<br>3. Enolase N-terminal domain (4)<br>4. RuBisCo, C-terminal domain (2)<br>5. beta-N-acetylhexosaminida (2)<br>6. FMN-linked oxidoreductase (2)<br>7. E set domains (2)<br>8. Other (10)            |
|                                | NAD(P)-binding Rossmann-fold (11)                                       | 1. G-3-P dehydrogenase (6)<br>2. LDH N-terminal domain-like (4)<br>3. Lactate & malate dehydrogenase (4)<br>4. Dihydrodipicolinate reductase (2)<br>5. GAPDH-like (2)<br>6. Succinyl-CoA synthetase (1)<br>7. Glucose 6-phosphate dehydrogenase (1)<br>8. Other (2) |
|                                | Class II aaRS and biotin synthetases (large mixed beta-sheet) (10)      | 1. Class II aminoacyl-tRNA synthetase (3)<br>2. Anticodon-binding domain (6)<br>3. Seryl-tRNA synthetase (1)<br>4. GAD domain (1)<br>5. Myf domain (1)<br>6. Biotin repressor-like (1)<br>7. Other (3)                                                              |
|                                | FAD/NAD(P)-binding domain - central parallel beta-sheet (10)            | 1. FAD/NAD-linked reductases N-ter (4)<br>2. FAD/NAD-linked reductases C-ter (4)<br>3. FAD-linked reductases, N-terminal (3)<br>4. Succinate dehydrogenase/fumarate (4)<br>5. Ferredoxin domains (1)<br>6. Dihydropyrimidine dehydrogenase.. (1)<br>7. Other (6)    |
|                                | Zincin-like (mixed beta sheet) (9)                                      | 1. Metalloproteases (7)<br>2. (Trans)glycosidases (2)<br>3. beta-N-acetylhexosaminida (2)<br>4. E set domains (1)<br>5. beta-Roll (superhelix turn) (1)<br>6. Carbohydrate-binding domain (1)                                                                       |
|                                | Others (183)                                                            | 1. TIM beta/alpha-barrel (13)<br>2. NAD(P)-binding Rossmann-fold (11)<br>3. Ferredoxin-like ( alpha+beta) (11)<br>4. FAD/NAD(P)-binding domain (10)<br>5. Class II aaRS and biotin synthetases (9)<br>6. ATP-grasp (9)<br>7. Lysozyme-like (8)<br>8. Other (176)    |
| <b>All beta proteins (144)</b> | TIM beta/alpha-barrel (16)                                              | 1. (Trans)glycosidases (9)<br>2. Glycosyl hydrolase domain (6)<br>3. E set domains (3)<br>4. Phosphoenolpyruvate domain. (2)<br>5. Alanine racemase C-terminal. (2)<br>6. Chitinase insertion domain (2)<br>7. PLP-binding barrel (2)<br>8. Other (8)               |
|                                | Trypsin-like serine proteases (barrel) (14)                             | 1. Eukaryotic proteases (9)<br>2. Prokaryotic proteases (3)<br>3. Viral cysteine protease (1)<br>4. EGF-type module (1)<br>5. Viral proteases (beta sheet) (1)                                                                                                      |
|                                | Immunoglobulin-like beta sandwich                                       | 1. E set domains (6)<br>2. (Trans)glycosidases (3)<br>3. Galactose-binding domain (2)                                                                                                                                                                               |



|                                |                                      |                                                                                                                                                                                                                                                                                                                                                                                                |
|--------------------------------|--------------------------------------|------------------------------------------------------------------------------------------------------------------------------------------------------------------------------------------------------------------------------------------------------------------------------------------------------------------------------------------------------------------------------------------------|
|                                |                                      | <ol style="list-style-type: none"> <li>4. Cu,Zn superoxide dismutase (2)</li> <li>5. CBD9-like (1)</li> <li>6. Immunoglobulin (1)</li> <li>7. Galactose oxidase, centra ... (1)</li> <li>8. Other (6)</li> </ol>                                                                                                                                                                               |
|                                | Acid proteases- barrel closed (9)    | <ol style="list-style-type: none"> <li>1. Pepsin-like (5)</li> <li>2. Retroviral protease (4)</li> </ol>                                                                                                                                                                                                                                                                                       |
|                                | OB-fold closed or partially open (9) | <ol style="list-style-type: none"> <li>1. Nucleic acid-binding prot ... (6)</li> <li>2. Class II aaRS and biotin ... (4)</li> <li>3. Inorganic pyrophosphatase ... (2)</li> <li>4. GAD domain-like ( Superfa ... (1)</li> <li>5. Anticodon-binding domain ... (1)</li> <li>6. DNA ligase/mRNA capping e ... (1)</li> <li>7. Staphylococcal nuclease ( ... (1)</li> <li>8. Other (2)</li> </ol> |
|                                | 6-bladed beta-propeller (8)          | <ol style="list-style-type: none"> <li>1. Sialidases (6)</li> <li>2. E set domains (1)</li> <li>3. Galactose-binding domain (1)</li> <li>4. Soluble quinoprotein glucos dehydrogenase (1)</li> <li>5. Concanavalin A-like lectine (1)</li> <li>6. Thermostable phytase (1)</li> </ol>                                                                                                          |
|                                | SH3-like barrel (8)                  | <ol style="list-style-type: none"> <li>1. SH3-domain ( Superfamily) (4)</li> <li>2. Protein kinase-like (2)</li> <li>3. Electron transport accesory proteins (2)</li> <li>4. SH2 domain ( Superfamily) (2)</li> <li>5. Nitrile hydratase alpha chains (1)</li> <li>6. Fumarylacetoacetate hydrolase (1)</li> <li>7. Class II aaRS and biotin synthetases (1)</li> <li>8. Other (2)</li> </ol>  |
|                                | Others (105)                         | <ol style="list-style-type: none"> <li>1. TIM beta/alpha-barrel (16)</li> <li>2. Barrel-sandwich hybrid (6)</li> <li>3. Double-stranded beta-helix (6)</li> <li>4. Glycosyl hydrolase domain (6)</li> <li>5. Immunoglobulin-like beta-sandwich (6)</li> <li>6. Concanavalin A-like lectins (6)</li> <li>7. OB-fold (barrel, closed) (6)</li> <li>8. Other (87)</li> </ol>                      |
| <b>All alpha proteins (99)</b> | alpha/alpha toroid (8)               | <ol style="list-style-type: none"> <li>1. Six-hairpin glycosidases (3)</li> <li>2. Terpenoid cyclases/Protein (3)</li> <li>3. Hyaluronate lyase-like (1)</li> <li>4. Chondroitin AC/alginat (1)</li> <li>5. Seven-hairpin glycosidase (1)</li> <li>6. Protein prenylyltransferase (1)</li> <li>7. Galactose mutarotase-like (1)</li> <li>8. Other (2)</li> </ol>                               |
|                                | Thioredoxin fold (7)                 | <ol style="list-style-type: none"> <li>1. Class alpha GST (2)</li> <li>2. Class alpha GST (2)</li> <li>3. Class zeta GST (1)</li> <li>4. Class sigma GST (1)</li> <li>5. Class phi GST (1)</li> <li>6. Class pi GST (1)</li> <li>7. Class sigma GST (1)</li> <li>8. Other (4)</li> </ol>                                                                                                       |
|                                | GST C-terminal domain-like (7)       | <ol style="list-style-type: none"> <li>1. Class alpha GST (2)</li> <li>2. Class alpha GST (2)</li> <li>3. Class zeta GST (1)</li> <li>4. Class sigma GST (1)</li> <li>5. Class phi GST (1)</li> <li>6. Class pi GST (1)</li> <li>7. Class sigma GST (1)</li> </ol>                                                                                                                             |
|                                | DNA/RNA-binding 3-helical bundle (7) | <ol style="list-style-type: none"> <li>1. `Winged helix` DNA-binding (5)</li> <li>2. Creatinase/aminopeptidase (2)</li> <li>3. Methylated DNA-protein cyteine methyltransferase (1)</li> <li>4. Class II aaRS and biotin synthetase (1)</li> <li>5. C-ter domain of transcriptional repressors (1)</li> </ol>                                                                                  |

|                                                  |                                                             |                                                                                                                                                                                                                                                                                                                                                                                                 |
|--------------------------------------------------|-------------------------------------------------------------|-------------------------------------------------------------------------------------------------------------------------------------------------------------------------------------------------------------------------------------------------------------------------------------------------------------------------------------------------------------------------------------------------|
|                                                  |                                                             | <ol style="list-style-type: none"> <li>6. Nucleic acid-binding protein (1)</li> <li>7. Restriction endonuclease (1)</li> <li>8. Other (3)</li> </ol>                                                                                                                                                                                                                                            |
|                                                  | Cytochrome P450 ( multihelical) (6)                         | <ol style="list-style-type: none"> <li>1. Cytochrome P450-CAM (1)</li> <li>2. Cytochrome P450-NOR (1)</li> <li>3. Cytochrome P450 bm-3 (1)</li> <li>4. Cytochrome P450-ERYF (1)</li> <li>5. Cyp119 ( thermophilic P450) (1)</li> <li>6. Cytochrome p450 14 alpha-demethylase. (1)</li> </ol>                                                                                                    |
|                                                  | NAD(P)-binding Rossmann-fold domains (5)                    | <ol style="list-style-type: none"> <li>1. L-3-hydroxyacyl CoA dehydrogenase (2)</li> <li>2. L-3-hydroxyacyl CoA dehydrogenase (2).</li> <li>3. UDP-glucose dehydrogenase (1)</li> <li>4. 6-phosphogluconate dehydrogenase (1)</li> <li>5. UDP-glucose dehydrogenase (2)</li> <li>6. Class II ketol-acid reductase (1)</li> <li>7. Other (2)</li> </ol>                                          |
|                                                  | 6-phosphogluconate dehydrogenase C-terminal domain-like (5) | <ol style="list-style-type: none"> <li>1. L-3-hydroxyacyl CoA dehydrogenase (2)</li> <li>2. L-3-hydroxyacyl CoA dehydrogenase (2)</li> <li>3. UDP-glucose dehydrogenase (1)</li> <li>4. 6-phosphogluconate dehydrogenase (1)</li> <li>5. UDP-glucose dehydrogenase (1)</li> <li>6. UDP-glucose dehydrogenase (1)</li> <li>7. Class II ketol-acid reductase (1)</li> <li>8. Other (2)</li> </ol> |
|                                                  | Others (78)                                                 | <ol style="list-style-type: none"> <li>1. DNA/RNA-binding 3-helical bundle (7)</li> <li>2. SAM domain-like (4)</li> <li>3. alpha-alpha superhelix (4)</li> <li>4. Ferritin-like (4)</li> <li>5. Ferredoxin-like ( alpha+beta) (4)</li> <li>6. alpha/alpha toroid (4)</li> <li>7. L-aspartase-like (3)</li> <li>8. Other (71)</li> </ol>                                                         |
| <b>Multi-domain proteins (alpha + beta) (26)</b> | beta-lactamase/transpeptidase-like (6)                      | <ol style="list-style-type: none"> <li>1. beta-Lactamase, class A (2)</li> <li>2. D-ala carboxy/transpeptidase (2)</li> <li>3. Class D beta-lactamase (1)</li> <li>4. AMPC beta-Lactamase, class C (1)</li> </ol>                                                                                                                                                                               |
|                                                  | Carbohydrate phosphatase-alpha+beta N-terminal domain (5)   | <ol style="list-style-type: none"> <li>1. Fructose-1,6-bisphosphatase (3)</li> <li>2. Inositol monophosphatase (1)</li> <li>3. Archaeal inositol monophosphatase (1)</li> </ol>                                                                                                                                                                                                                 |
|                                                  | DNA/RNA polymerases (5)                                     | <ol style="list-style-type: none"> <li>1. DNA polymerase I (2)</li> <li>2. DnaQ-like 3'-5' exonuclease (2)</li> <li>3. dsRNA phage RNA-dependent (1)</li> <li>4. RNA-dependent RNA-polymerase (1)</li> <li>5. Reverse transcriptase (1)</li> <li>6. Ribonuclease H (1)</li> </ol>                                                                                                               |
|                                                  | Ribonuclease H-like motif (3)                               | <ol style="list-style-type: none"> <li>1. DNA polymerase I (2)</li> <li>2. DnaQ-like 3'-5' exonuclease (2)</li> <li>3. Reverse transcriptase (1)</li> <li>4. Ribonuclease H (1)</li> </ol>                                                                                                                                                                                                      |
|                                                  | D-aminoacid aminotransferase-like PLP-dependent enzymes (2) | <ol style="list-style-type: none"> <li>1. Branched-chain aa amino-transferase (1)</li> <li>2. D-aa aminotransferase (1)</li> </ol>                                                                                                                                                                                                                                                              |
|                                                  | Heme-dependent catalase-like (2)                            | <ol style="list-style-type: none"> <li>1. Catalase II (1)</li> <li>2. Catalase I (1)</li> <li>3. Catalase, C-terminal domain (1)</li> </ol>                                                                                                                                                                                                                                                     |
|                                                  | Acyl-CoA dehydrogenase C-terminal domain- like (1)          | <ol style="list-style-type: none"> <li>1. Acyl-CoA dehydrogenase C-terminal domain- like</li> </ol>                                                                                                                                                                                                                                                                                             |
|                                                  | Others (7)                                                  | <ol style="list-style-type: none"> <li>1. Dehydroquinase synthase-I (1)</li> <li>2. HydB/Nqo4-like domain (1)</li> <li>3. DNA primase core (1)</li> <li>4. Acyl-CoA dehydrogenase (1)</li> </ol>                                                                                                                                                                                                |

|                                                            |                                                                                |                                                                                                                                                                                                                                                                                                                                                      |
|------------------------------------------------------------|--------------------------------------------------------------------------------|------------------------------------------------------------------------------------------------------------------------------------------------------------------------------------------------------------------------------------------------------------------------------------------------------------------------------------------------------|
|                                                            |                                                                                | <ol style="list-style-type: none"> <li>5. Acetyl-CoA synthetase-like (1)</li> <li>6. Prokaryotic type I DNA topoisomerase (1)</li> <li>7. Bromodomain-like (1)</li> <li>8. Other (2)</li> </ol>                                                                                                                                                      |
| <b>Small proteins (11)</b>                                 | Rubredoxin-like (4)                                                            | <ol style="list-style-type: none"> <li>1. Microbial and mitochondrial ADK (2)</li> <li>2. P-loop containing nucleoside triphosphate hydrolases (2)</li> <li>3. Zinc beta-ribbon (1)</li> <li>4. Nucleotidyl transferase (1)</li> <li>5. Anticodon-binding domain (1)</li> <li>6. Methionyl-tRNA synthetase (1)</li> </ol>                            |
|                                                            | Kringle-like (disulfide-rich fold; nearly all-beta) (3)                        | <ol style="list-style-type: none"> <li>1. Plasminogen (2)</li> <li>2. Prothrombin (1)</li> <li>3. Prothrombin (1)</li> </ol>                                                                                                                                                                                                                         |
|                                                            | Knottins (small inhibitors, toxins, lectins) (2)                               | <ol style="list-style-type: none"> <li>1. Bowman-Birk inhibitor (1)</li> <li>2. EGF/Laminin (Superfamily) (1)</li> <li>3. Trypsin-like serine protease (1)</li> </ol>                                                                                                                                                                                |
|                                                            | P-loop containing nucleoside triphosphate hydrolases (2)                       | <ol style="list-style-type: none"> <li>1. Microbial and mitochondrial ADK (2)</li> <li>2. Adenylate kinase (2)</li> </ol>                                                                                                                                                                                                                            |
|                                                            | GLA-domain (1)                                                                 | <ol style="list-style-type: none"> <li>1. GLA-domain (1)</li> </ol>                                                                                                                                                                                                                                                                                  |
|                                                            | 7-bladed beta-propeller (1)                                                    | <ol style="list-style-type: none"> <li>1. Methylamine dehydrogenase</li> </ol>                                                                                                                                                                                                                                                                       |
|                                                            | Cysteine-rich domain (1)                                                       | <ol style="list-style-type: none"> <li>1. Cysteine-rich domain (1)</li> </ol>                                                                                                                                                                                                                                                                        |
|                                                            | Others (3)                                                                     | <ol style="list-style-type: none"> <li>1. 7-bladed beta-propeller (1)</li> <li>2. Trypsin-like serine protease (1)</li> <li>3. Adenine nucleotide alpha hydrolase (1)</li> <li>4. Methylamine dehydrogenase (1)</li> <li>5. Knottins (1)</li> <li>6. Anticodon-binding domain AARS class I (1)</li> <li>7. Rubredoxin-like bound fold (1)</li> </ol> |
| <b>Membrane and cell surface proteins and peptides (2)</b> | Heme-binding four-helical bundle (1)                                           | <ol style="list-style-type: none"> <li>1. alpha-helical ferredoxin</li> </ol>                                                                                                                                                                                                                                                                        |
|                                                            | Spectrin repeat-like (1)                                                       | <ol style="list-style-type: none"> <li>1. Succinate dehydrogenase/fumarate reductase flavoprotein C- terminal domain</li> </ol>                                                                                                                                                                                                                      |
|                                                            | Transmembrane beta-barrel (1)                                                  | <ol style="list-style-type: none"> <li>1. Outer membrane phospholipase A (OMPLA)</li> </ol>                                                                                                                                                                                                                                                          |
|                                                            | Succinate dehydrogenase/fumarate reductase flavoprotein C- terminal domain (1) | <ol style="list-style-type: none"> <li>1. Succinate dehydrogenase/fumarate reductase flavoprotein, catalytic domain</li> </ol>                                                                                                                                                                                                                       |
|                                                            | beta-Grasp (ubiquitin-like) (1)                                                | <ol style="list-style-type: none"> <li>1. 2Fe-2S ferredoxin-like</li> </ol>                                                                                                                                                                                                                                                                          |
|                                                            | Globin-like_1 (1)                                                              | <ol style="list-style-type: none"> <li>2. alpha-helical ferredoxin</li> </ol>                                                                                                                                                                                                                                                                        |

**Table SI-11.** Structural diversity summary of the D&D non-enzyme subset according to SCOP hierarchal database

| <b>Class</b>                              | <b>Folds</b>                                              | <b>Superfamily/family</b>                                                                                                                                                                                                                                                                                                                                                      |
|-------------------------------------------|-----------------------------------------------------------|--------------------------------------------------------------------------------------------------------------------------------------------------------------------------------------------------------------------------------------------------------------------------------------------------------------------------------------------------------------------------------|
| <b>Alpha and beta proteins a/b (74)</b>   | P-loop containing nucleoside triphosphate hydrolases (21) | 1. G proteins (core: mixed beta sheet) (12)                                                                                                                                                                                                                                                                                                                                    |
|                                           |                                                           | 2. Elongation factors (4)                                                                                                                                                                                                                                                                                                                                                      |
|                                           |                                                           | 3. Nitrogenase iron protein-like (3)                                                                                                                                                                                                                                                                                                                                           |
|                                           |                                                           | 4. EF-Tu/eEF-1alpha/eIF2-gamma Cterminal domain (3)                                                                                                                                                                                                                                                                                                                            |
|                                           |                                                           | 5. Extended AAA-ATPase domain (2)                                                                                                                                                                                                                                                                                                                                              |
|                                           |                                                           | 6. Motor proteins (2)                                                                                                                                                                                                                                                                                                                                                          |
|                                           |                                                           | 7. Domain of the SRP/SRP receptor G proteins (2)                                                                                                                                                                                                                                                                                                                               |
|                                           |                                                           | 8. Other (9)                                                                                                                                                                                                                                                                                                                                                                   |
|                                           | Periplasmic binding protein-like II (16)                  | 1. Phosphate binding protein-like (11)<br>2. Transferrin (further duplication) (5)                                                                                                                                                                                                                                                                                             |
|                                           | Flavodoxin-like (6)                                       | 1. CheY-like (Superfamily) (4)<br>2. Flavoproteins (Superfamily) (2)<br>3. C-terminal effector domain (1)                                                                                                                                                                                                                                                                      |
|                                           | Thioredoxin fold (5)                                      | 1. Thioldtransferase (3)<br>2. Glutathione S-transferase Nterminal (1)<br>3. Glutathione peroxidase-like (1)<br>4. Glutathione S-transferase Cterminal (1)                                                                                                                                                                                                                     |
|                                           | Periplasmic binding protein-like I (5)                    | 1. D-allose-binding protein (1)<br>2. Galactose/glucose-binding protein (1)<br>3. Leucine-isoleucine-,valine bonding protein (1)<br>4. D-ribose-binding protein (1)<br>5. L-arabinose-binding protein (1)                                                                                                                                                                      |
|                                           | vWA-like (4)                                              | 1. Integrin alpha2-beta1 (2)<br>2. Integrin alpha M (CR3, CD11b/CD18 (1)<br>3. Collagen-like peptides (1)<br>4. Integrin CD11a/CD18 (LFA1) (1)                                                                                                                                                                                                                                 |
|                                           | Reductase/isomerase/elongation factor common domain (4)   | 1. Elongation factor Tu (EF-Tu domain 2 (2)<br>2. Elongation factor Tu (EF-Tu) (2)<br>3. Elongation factor Tu (EF-Tu Nterminal (2)<br>4. Elongation factor eEF-1alpha domain (1)<br>5. Initiation factor IF2/eIF (1)<br>6. Guanine nucleotide Exchange factor domain (1)<br>7. Elongation factor eEF-1alpha domain2 (1)<br>8. Other (2)                                        |
|                                           | Others (31)                                               | 1. P-loop containing nucleoside thriphosphate hydrolase (11)<br>2. Reductase/isomerase/elongation factor common domain (4)<br>3. TIM beta/alpha-barrel (3)<br>4. Elongation factor/aminomethyltransferase common domain (3)<br>5. Four-helical up-and-down bunle (2)<br>6. Transducin (alpha subunit) insertion domain (2)<br>7. Leucine-rich repeat, LRR (2)<br>8. Other (21) |
| <b>Alpha and beta proteins (a+b) (96)</b> | beta-Grasp (ubiquitin-like) (13)                          | 1. Superantigen toxins, C-terminal domain (5)<br>2. Bacterial enterotoxins (5)<br>3. 2Fe-2S ferredoxin-like (superfamily) (3)<br>4. Immunoglobulin-binding domains (3)<br>5. Ubiquitin-like (Superfamily) (1)                                                                                                                                                                  |

|                                |                                        |                                                                                                                                                                                                                                                                                                                                                                                                                                                                                                                |
|--------------------------------|----------------------------------------|----------------------------------------------------------------------------------------------------------------------------------------------------------------------------------------------------------------------------------------------------------------------------------------------------------------------------------------------------------------------------------------------------------------------------------------------------------------------------------------------------------------|
|                                |                                        | 6. Staphylokinase/streptokinase (superfamily) (1)                                                                                                                                                                                                                                                                                                                                                                                                                                                              |
| Ferredoxin-like (10)           |                                        | <ol style="list-style-type: none"> <li>1. 4Fe-4S ferredoxins (Superfamily) (3)</li> <li>2. Viral DNA-binding domains (2)</li> <li>3. Molybdenum cofactor biosynthesis protein C(1)</li> <li>4. eEF-1beta-like (Superfamily) (1)</li> <li>5. EF-Tu/eEF-1alpha/eIF2-gamma Cterminal domain (1)</li> <li>6. RNA-binding domain, RBD (1)</li> <li>7. P-loop containing nucleoside triphosphate hydrolases (1)</li> <li>8. Other (3)</li> </ol>                                                                     |
| C-type lectin-like (9)         |                                        | <ol style="list-style-type: none"> <li>1. C-type lectin domain (8)</li> <li>2. Triple coiled coil domain of C type lectines (1)</li> <li>3. Endostatin (decorated with many insertions in the common fold (1)</li> </ol>                                                                                                                                                                                                                                                                                       |
| IL8-like (6)                   |                                        | <ol style="list-style-type: none"> <li>1. Chemokine domain of fractaline (1)</li> <li>2. Stromal cell-derived factor 1 (1)</li> <li>3. Platelet factor 4, PF4 (1)</li> <li>4. RANTES (regulated upon activation T cell expressed and secretes (1)</li> <li>5. Interleukin-8, IL-8 (1)</li> <li>6. Monocyte chemoattractant protein (1)</li> </ol>                                                                                                                                                              |
| OB-fold (5)                    |                                        | <ol style="list-style-type: none"> <li>1. Streptococcal superantigen Smez-2 (1)</li> <li>2. Streptococcal superantigen SSA (1)</li> <li>3. Staphylococcal enterotoxin B (1)</li> <li>4. Toxic shock syndrome toxin-1 (1)</li> <li>5. Staphylococcal enterotoxin B (1)</li> <li>6. Toxic shock syndrome toxin 1 (1)</li> <li>7. Streptococcal superantigen SSA (1)</li> <li>8. Other (2)</li> </ol>                                                                                                             |
| Profilin-like (5)              |                                        | <ol style="list-style-type: none"> <li>1. PYP-like sensor domain (2)</li> <li>2. Profilin (actin-binding protein) (2)</li> <li>3. GAF domain-like (1)</li> </ol>                                                                                                                                                                                                                                                                                                                                               |
| SH2-like (4)                   |                                        | <ol style="list-style-type: none"> <li>1. Growth factor receptor-bound protein 2 (2)</li> <li>2. N-terminal domain of cbl ... (1)</li> <li>3. Cbl (1)</li> <li>4. Cbl (1)</li> <li>5. Phosphatidylinositol 3-kinase (1)</li> </ol>                                                                                                                                                                                                                                                                             |
| Others (52)                    |                                        | <ol style="list-style-type: none"> <li>1. Cystatin-like (Core: alpha beta, helix pack against coiled antiparallel beta sheet... (4)</li> <li>2. TBP-like (beta-alpha-beta) (3)</li> <li>3. CI-2 family of serine protease inhibitors (2)</li> <li>4. HIT-like (alpha-beta(3)- ... (2)</li> <li>5. Cytochrome b5-like heme/steroid binding domain) (2)</li> <li>6. DNA clamp (contains two helices and two beta sheets (2)</li> <li>7. Immunoglobulin-like beta- sandwich (2)</li> <li>8. Other (37)</li> </ol> |
| <b>All beta proteins (156)</b> | Immunoglobulin-like beta-sandwich (37) | <ol style="list-style-type: none"> <li>1. Immunoglobulin ( Superfamily) (23)</li> <li>2. Fibronectin type III ( Superfamily) (6)</li> <li>3. E set domains ( `Early` Ig likes fold families(5)</li> <li>4. 4-helical cytokines (2)</li> <li>5. Hemocyanin, N-terminal domain (2)</li> <li>6. Di-copper centre-containing domain (2)</li> <li>7. Actinoxanthin-like (Superfamily) (1)</li> <li>8. Other (3)</li> </ol>                                                                                          |
|                                | OB-fold (18)                           | <ol style="list-style-type: none"> <li>1. Nucleic acid-binding proteins ... (8)</li> <li>2. Bacterial enterotoxins (7)</li> <li>3. Superantigen toxins, C-terminal domain (5)</li> </ol>                                                                                                                                                                                                                                                                                                                       |

|                                 |                                            |                                                                                                                                                                                                                                                                                                                                                                                                                                                           |
|---------------------------------|--------------------------------------------|-----------------------------------------------------------------------------------------------------------------------------------------------------------------------------------------------------------------------------------------------------------------------------------------------------------------------------------------------------------------------------------------------------------------------------------------------------------|
|                                 |                                            | <ol style="list-style-type: none"> <li>4. MOP-like ( Superfamily) (2)</li> <li>5. RuvA domain 2-like (1)</li> <li>6. DNA helicase RuvA subunit, C terminal domain (1)</li> <li>7. TIMP-like (Superfamily) (1)</li> <li>8. Other (3)</li> </ol>                                                                                                                                                                                                            |
|                                 | Lipocalins (11)                            | <ol style="list-style-type: none"> <li>1. Retinol binding protein-like (9)</li> <li>2. Fatty acid binding protein-like (2)</li> </ol>                                                                                                                                                                                                                                                                                                                     |
|                                 | Cupredoxin-like (8)                        | <ol style="list-style-type: none"> <li>1. Plastocyanin/azurin-like mono domain protein (7)</li> <li>2. Nitrosocyanin (1)</li> </ol>                                                                                                                                                                                                                                                                                                                       |
|                                 | SH3-like barrel (7)                        | <ol style="list-style-type: none"> <li>1. SH3-domain (Superfamily) (3)</li> <li>2. Cell growth inhibitor/plasmid maintenance toxic components (1)</li> <li>3. Chromo domain-like (SH3-like barrel) (1)</li> <li>4. Myosin S1 fragment, N-terminal domain (1)</li> <li>5. Translation proteins SH3-like domain (1)</li> <li>6. P-loop containing nucleoside triphosphate hydrolases (1)</li> <li>7. Nucleic acid-binding proteins (1)</li> </ol>           |
|                                 | beta-Trefoil (7)                           | <ol style="list-style-type: none"> <li>1. Cytokine (Superfamily) (3)</li> <li>2. STI-like (Superfamily) (2)</li> <li>3. Agglutinin (superfamily) ... (1)</li> <li>4. Ricin B-like lectins (Superfamily) (1)</li> </ol>                                                                                                                                                                                                                                    |
|                                 | Concanavalin A-like lectins/glucanases (6) | <ol style="list-style-type: none"> <li>1. Legume lectins (3)</li> <li>2. Galectin (animal S-lectin) (2)</li> <li>3. Pentraxin (pentaxin) (1)</li> </ol>                                                                                                                                                                                                                                                                                                   |
|                                 | others (78)                                | <ol style="list-style-type: none"> <li>1. OB-fold (barrel, closed or partly opened)</li> <li>2. Immunoglobulin-like beta sandwich (6)</li> <li>3. Common fold of diphtheria toxin (6)</li> <li>4. Double-stranded beta-helix (5)</li> <li>5. beta-Grasp (ubiquitin-like) (5)</li> <li>6. P-loop containing nucleoside triphosphate hydrolases (5)</li> <li>7. Reductase/isomerase/elongation factor common domain (4)</li> <li>8. Other (65)</li> </ol>   |
| <b>All alpha proteins (132)</b> | EF Hand-like (15)                          | <ol style="list-style-type: none"> <li>1. Calmodulin-like ( Duplication) (8)</li> <li>2. Parvalbumin ( 6-helices; arrays 3 hairpirins) (2)</li> <li>3. S100 proteins ( dimer) (2)</li> <li>4. EF-hand modules in multidomain proteins (2)</li> <li>5. WW domain (1)</li> <li>6. N-terminal domain of cbl (1)</li> <li>7. Calbindin D9K (1)</li> <li>8. Other (1)</li> </ol>                                                                               |
|                                 | Four-helical up-and-down bundle (11)       | <ol style="list-style-type: none"> <li>1. Apolipoprotein ( Superfamily) (3)</li> <li>2. P-loop containing nucleoside triphosphate hydrolases (2)</li> <li>3. Aspartate receptor, ligand-binding domain (2)</li> <li>4. Domain of the SRP/SRP receptor G proteins (2)</li> <li>5. FKBP12-rapamycin-binding domain (1)</li> <li>6. TMV-like viral coat proteins (1)</li> <li>7. Cytochromes (Heme-containing proteins) (1)</li> <li>8. Other (1)</li> </ol> |
|                                 | DNA/RNA-binding 3-helical bundle (11)      | <ol style="list-style-type: none"> <li>1. `Winged helix` DNA-binding domain (6)</li> <li>2. Homeodomain-like (consists only of helices) (2)</li> <li>3. C-terminal effector domain of the bipartite response regulators (2)</li> <li>4. Iron-dependent repressor protein (1)</li> <li>5. Tetracyclin repressor-like C terminal domain (1)</li> <li>6. MOP-like ( Superfamily) (1)</li> </ol>                                                              |

|                            |                                                  |                                                                                                                                                                                                                                                                                                                                                    |
|----------------------------|--------------------------------------------------|----------------------------------------------------------------------------------------------------------------------------------------------------------------------------------------------------------------------------------------------------------------------------------------------------------------------------------------------------|
|                            |                                                  | 7. P-loop containing nucleoside triphosphate hydrolases (1)                                                                                                                                                                                                                                                                                        |
|                            |                                                  | 8. Other (4)                                                                                                                                                                                                                                                                                                                                       |
|                            | Globin-like (9)                                  | 1. Globins (Heme-binding protein) (7)<br>2. Phycocyanin-like phycobilisome proteins (2)                                                                                                                                                                                                                                                            |
|                            | Cytochrome c (8)                                 | 1. Cytochrome c2 (3)<br>2. Cytochrome c6 (2)<br>3. Cytochrome c551 (1)<br>4. Cytochrome c552 (1)<br>5. Photosystem II associated Cyt c549 (1)                                                                                                                                                                                                      |
|                            | alpha-alpha superhelix                           | 1. ARM repeat ( Superfamily) (3)<br>2. TPR-like (Superfamily) (2)<br>3. ENTH/VHS domain (Superfamily) (2)<br>4. GAT-like domain (Superfamily) (1)<br>5. 14-3-3 protein (Superfamily) (1)<br>6. beta-Catenine bound non-globular protein regions (1)                                                                                                |
|                            | 4-helical cytokines                              | 1. Long-chain cytokines (3)<br>2. Interferons/interleukin-10 (3)<br>3. Short-chain cytokines (2)<br>4. Fibronectin type III (2)                                                                                                                                                                                                                    |
|                            | Other (77)                                       | 1. Nuclear receptor ligand-binding domain (8)<br>2. DNA/RNA-binding 3-helical bundle (7)<br>3. Multiheme cytochromes (6)<br>4. P-loop containing nucleoside triphosphate hydrolases (6)<br>5. Immunoglobulin-like beta- sandwich (4)<br>6. SAM domain-like ( 4-5 helices) (3)<br>7. OB-fold (barrel, closed or partly opened) (3)<br>8. Other (59) |
| <b>Small proteins (38)</b> | Knottins (small inhibitors, toxins, lectins) (8) | 1. Plant lectins/antimicrobial peptides (2)<br>2. Scorpion toxin-like (Superfamily) (2)<br>3. Leech antihemostatic proteins (2)<br>4. EGF/Laminin (Superfamily) (2)                                                                                                                                                                                |
|                            | Cystine-knot cytokines (4)                       | 1. Neurotrophin (2)<br>2. Transforming growth factor (1)<br>3. Platelet-derived growth factor like (1)                                                                                                                                                                                                                                             |
|                            | Snake toxin-like (4)                             | 1. Erabutoxin A (1)<br>2. Fasciculin (1)<br>3. Neurotoxin I (1)<br>4. Cardiotoxin V4II (Toxin III) (1)                                                                                                                                                                                                                                             |
|                            | Rubredoxin-like (4)                              | 1. Rubredoxin (3)<br>2. Desulfiredoxin (1)<br>3. Ferritin (1)                                                                                                                                                                                                                                                                                      |
|                            | BPTI-like (3)                                    | 1. Pancreatic trypsin inhibitor (3)                                                                                                                                                                                                                                                                                                                |
|                            | Defensin-like (2)                                | 1. Beta-defensin, BD (1)<br>2. Defensin HNP-3 (1)                                                                                                                                                                                                                                                                                                  |
|                            | HIPIP (high potential iron protein) (2)          | 1. HIPIP (high potential iron protein) (2)                                                                                                                                                                                                                                                                                                         |
|                            | Others (small inhibitors, toxins, lectins) (12)  | 1. Kazal-type serine protease inhibitors (2)<br>2. Kringle-like ( disulfide-rich fold) (2)<br>3. Insulin-like (2)<br>4. Crambin-like ( disulfide- rich alfa beta fold) (2)<br>5. Trefoil/Plexin domain-like (1)<br>6. Ferritin-like (core: 4 h ... (1)<br>7. LDL receptor-like module (1)<br>8. Other (3)                                          |

|                                                             |                                              |                                                                                                                                                                                                                                                                                                                                                                                                                                          |                                                                                                                                                                                                                                                                                                                                                                                                                                           |
|-------------------------------------------------------------|----------------------------------------------|------------------------------------------------------------------------------------------------------------------------------------------------------------------------------------------------------------------------------------------------------------------------------------------------------------------------------------------------------------------------------------------------------------------------------------------|-------------------------------------------------------------------------------------------------------------------------------------------------------------------------------------------------------------------------------------------------------------------------------------------------------------------------------------------------------------------------------------------------------------------------------------------|
| <b>Membrane and cell surface proteins and peptides (14)</b> | Transmembrane beta-barrels (7)               | <ol style="list-style-type: none"> <li>1. Porins ( Superfamily) (5)</li> <li>2. OMPA-like ( forms (8,10) (2)</li> </ol>                                                                                                                                                                                                                                                                                                                  |                                                                                                                                                                                                                                                                                                                                                                                                                                           |
|                                                             | Toxins' membrane translocation domains (2)   | <ol style="list-style-type: none"> <li>1. delta-Endotoxin (insecticide (1)</li> <li>2. delta-Endotoxin (insecticide (1)</li> <li>3. Galactose-binding domain-like (1)</li> <li>4. Diphtheria toxin, C-terminal domain (1)</li> <li>5. Diphtheria toxin, middle domain (1)</li> <li>6. ADP-ribosylation (Superfamily) (1)</li> </ol>                                                                                                      |                                                                                                                                                                                                                                                                                                                                                                                                                                           |
|                                                             | Family A G protein-coupled receptor-like (2) | <ol style="list-style-type: none"> <li>1. Bacteriorhodopsin (a light driven proton pump (1)</li> <li>2. Sensory rhodopsin II (1)</li> </ol>                                                                                                                                                                                                                                                                                              |                                                                                                                                                                                                                                                                                                                                                                                                                                           |
|                                                             | Diphtheria toxin, C-terminal domain (1)      | <ol style="list-style-type: none"> <li>1. Diphtheria toxin, C-terminal domain</li> </ol>                                                                                                                                                                                                                                                                                                                                                 |                                                                                                                                                                                                                                                                                                                                                                                                                                           |
|                                                             | Light-harvesting complex subunits (1)        | <ol style="list-style-type: none"> <li>1. Light-harvesting complex subunits</li> </ol>                                                                                                                                                                                                                                                                                                                                                   |                                                                                                                                                                                                                                                                                                                                                                                                                                           |
|                                                             | Bacterial photosystem II reaction centre (1) | <ol style="list-style-type: none"> <li>1. Bacterial photosystem II reaction centre</li> </ol>                                                                                                                                                                                                                                                                                                                                            |                                                                                                                                                                                                                                                                                                                                                                                                                                           |
|                                                             | PRC-barrel domain (1)                        | <ol style="list-style-type: none"> <li>1. PRC-barrel domain</li> </ol>                                                                                                                                                                                                                                                                                                                                                                   |                                                                                                                                                                                                                                                                                                                                                                                                                                           |
|                                                             | Other (4)                                    | <ol style="list-style-type: none"> <li>1. <u>Toxins (2)</u></li> <li>2. <u>Common fold of diphtheria toxin (1)</u></li> <li>3. <u>Bacterial photosystem II (1)</u></li> <li>4. <u>PRC-barrel domain (1)</u></li> <li>5. <u>Galactose-binding domain- like (1)</u></li> <li>6. <u>Leukocidin-like ( subunit fold contains beta sandwich (1)</u></li> <li>7. <u>Single transmembrane helix (1)</u></li> <li>8. <u>Other (2)</u></li> </ol> |                                                                                                                                                                                                                                                                                                                                                                                                                                           |
|                                                             | Coiled coil proteins (11)                    | Parallel coiled-coil (7)                                                                                                                                                                                                                                                                                                                                                                                                                 | <ol style="list-style-type: none"> <li>1. TRAF domain-like (2)</li> <li>2. Trimerization domain of TRAF (2)</li> <li>3. Inovirus (filamentous phage) major coat protein (1)</li> <li>4. Intermediate filament protein ... (1)</li> <li>5. C-type lectin-like (Superfamily) ... (1)</li> <li>6. Triple coiled coil domain of c type lectin (1)</li> <li>7. Fibrinogen coiled-coil and central regions (1)</li> <li>8. Other (1)</li> </ol> |
|                                                             |                                              | Stalk segment of viral fusion proteins (3)                                                                                                                                                                                                                                                                                                                                                                                               | <ol style="list-style-type: none"> <li>1. Retrovirus gp41 protease-resistant core (2)</li> <li>2. MoMLV p15 core fragment (1)</li> </ol>                                                                                                                                                                                                                                                                                                  |
|                                                             |                                              | TRAF domain-like (2)                                                                                                                                                                                                                                                                                                                                                                                                                     | <ol style="list-style-type: none"> <li>1. TNF receptor associated factor 2m(2)</li> <li>2. TRAF2 (2)</li> </ol>                                                                                                                                                                                                                                                                                                                           |
|                                                             |                                              | C-type lectin-like (1)                                                                                                                                                                                                                                                                                                                                                                                                                   | <ol style="list-style-type: none"> <li>1. C-type lectin-like</li> </ol>                                                                                                                                                                                                                                                                                                                                                                   |
|                                                             |                                              | Antiparallel coiled-coil (1)                                                                                                                                                                                                                                                                                                                                                                                                             | <ol style="list-style-type: none"> <li>1. Oligomerization domain of hepatitis delta antigen</li> </ol>                                                                                                                                                                                                                                                                                                                                    |
|                                                             |                                              | <b>Other 14</b>                                                                                                                                                                                                                                                                                                                                                                                                                          |                                                                                                                                                                                                                                                                                                                                                                                                                                           |



**Table SI-12.** Structural information of the selected ProtDCal's features from the different families of descriptors (0D, 1D & 3D)

| <i>Descriptors</i>             | <i>Associated Information</i>                                                                                                  |
|--------------------------------|--------------------------------------------------------------------------------------------------------------------------------|
| <b>0D type:</b>                |                                                                                                                                |
| <i>ECI_NO_ALR_N2</i>           | Amount of <b>aliphatic residues</b> , represented with their electron charge indices (polarity)                                |
| <i>Pt_NO_ILE_N2</i>            | Amount of <b>Ile</b> represented by its probability to exits in a turn motif.                                                  |
| <i>ZI_NO_ALA_N1</i>            | Amount of <b>Ala</b> represented with its hydrophobicity                                                                       |
| <i>ECI_NO_NPR_N2</i>           | Amount of <b>non-polar residues</b> represented with electron charge indices                                                   |
| <i>DHf_NO_NPR_SI50</i>         | Mean content of <b>non-polar residues</b> represented with its heat of formation                                               |
| <i>Xi_NO_GLY_N1</i>            | Amount of <b>Gly</b> represented with its dihedral angles compressibility                                                      |
| <i>HP_NO_UCR_TI50</i>          | Mean content of <b>non-charged-polar-residues</b> represented with their hydrophobicity                                        |
| <i>ISA_NO_HIS_N1</i>           | Amount of <b>His</b> represented with its non-polar area                                                                       |
| <i>DHf_NO_ARG_N1</i>           | Amount of <b>Arg</b> represented by its heat of formation                                                                      |
| <b>1D type:</b>                |                                                                                                                                |
| <i>L1-9_ES_ALR_MI50</i>        | Mean content of <b>aliphatic residues</b> represented with their bonds compressibility                                         |
| <i>Z2_ES_ALR_MI50</i>          | Mean content of <b>aliphatic residues</b> represented with theirs steric characteristics                                       |
| <i>Z1_ES_ILE_N1</i>            | Amount of <b>Ile</b> weighted with their hydrophobic properties                                                                |
| <i>HP_ES_NPR_MI50</i>          | Mean content of <b>non-polar residues</b> represented with their hydrophobicity                                                |
| <i>Ap_ES_ARM_N2</i>            | Amount of <b>aromatic residues</b> represented with their polar area                                                           |
| <i>Z2_ES_PHE_N2</i>            | Amount of <b>Phe</b> weighted with their steric properties                                                                     |
| <i>HP_ES_PRT_MI50</i>          | Mean hydrophobicity content of <b>the protein</b>                                                                              |
| <i>Gs(U)_ES_PRT_MI50</i>       | Mean superficial free energy of <b>the protein</b>                                                                             |
| <i>Z3_ES_RTR_MI50</i>          | Mean content of <b>residues favoring reverse turns</b> , being represented with their polar properties                         |
| <i>Z2_ES_PLR_N1</i>            | Amount of <b>polar residues</b> weighted with their steric properties                                                          |
| <i>Mw_ES_PLR_MI50</i>          | Mean content of <b>polar residues</b> represented with their molar weight                                                      |
| <i>Z3_ES_ARG_N1</i>            | Amount of <b>Arg</b> represented with their polar properties                                                                   |
| <i>Xi_ES_HIS_N2</i>            | Amount of <b>His</b> weighted with their dihedral angles compressibility                                                       |
| <b>3D type:</b>                |                                                                                                                                |
| <i>wPhiH(ECI)_NO_ALR_N1</i>    | <b>Aliphatic residues</b> , with $\alpha$ -helix-like $\phi$ angles, represented with their electron charge indices (polarity) |
| <i>wFLC(IP)_NO_ALR_Ar</i>      | Topology of <b>aliphatic residues</b> represented with their isoelectric points                                                |
| <i>wNc(ISA)_NO_ALR_N2</i>      | Topology of <b>aliphatic residues</b> represented with their non-polar area                                                    |
| <i>wNc(Z2)_NO_ALR_N2</i>       | Topology of <b>aliphatic residues</b> represented with their steric properties                                                 |
| <i>wCTP(ZI)_NO_LEU_G</i>       | Topology of <b>Leu</b> residues represented by the hydrophobic properties                                                      |
| <i>wNLC(ECI)_NO_NPR_N2</i>     | Topology of <b>non-polar residues</b> represented with their electron charge indices                                           |
| <i>wNLC(IP)_NO_NPR_MI50</i>    | Topology of <b>non-polar residues</b> represented with their isoelectric points                                                |
| <i>wPhiS(ISA)_NO_NPR_G</i>     | <b>Non-polar residues</b> , with $\beta$ -sheet-like $\phi$ angles, represented with their non-polar areas                     |
| <i>wCTP(IP)_NO_PHE_N2</i>      | Topology of <b>Phe</b> residues represented with the isoelectric point                                                         |
| <i>wCTP(Z1)_NO_PHE_I50</i>     | Topology of <b>Phe</b> residues represented by the hydrophobic properties                                                      |
| <i>wCTP(ISA)_NO_INT10.0_N1</i> | Topology of <b>internal residues</b> represented with their non-polar areas                                                    |
| <i>wLCO(IP)_NO_INT10.0_N1</i>  | Topology of <b>internal residues</b> represented with their isoelectric points                                                 |
| <i>wPhiH(ISA)_NO_INT10.0_G</i> | <b>Internal residues</b> , with $\alpha$ -helix-like $\phi$ angles, represented with their non-polar areas                     |
| <i>wPhiI(Z1)_NO_ALR_N2</i>     | <b>Aliphatic residues</b> , with irregular $\phi$ angles, represented with their hydrophobic properties                        |
| <i>wNc(Z1)_NO_UFR_MI50</i>     | Topology of <b>unfolding-promoters</b> represented by their hydrophobic properties                                             |
| <i>wNLC(IP)_NO_UFR_MI50</i>    | Topology of <b>unfolding-promoters</b> represented with their isoelectric points                                               |
| <i>wCTP(IP)_NO_GLY_G</i>       | Topology of <b>Gly</b> residues represented with the isoelectric point                                                         |
| <i>wNc(IP)_NO_GLY_N2</i>       | Topology of <b>Gly</b> residues represented with the isoelectric point                                                         |
| <i>A_NO_RTR_CV</i>             | Area of <b>residues favoring reverse turns</b>                                                                                 |
| <i>wFLC(IP)_NO_RTR_DE</i>      | Topology of <b>residues favoring reverse turns</b> represented with their isoelectric points                                   |
| <i>wPsiH(ISA)_NO_RTR_N1</i>    | <b>Residues favoring reverse turns</b> , with $\alpha$ -helix-like $\phi$ angles, represented with their non-polar area        |
| <i>wNc(IP)_NO_RTR_P2</i>       | Topology of <b>residues favoring reverse turns</b> represented with their isoelectric points                                   |
| <i>AGw_NO_PLR_MI50</i>         | Free energy of water molecules coordinated to <b>polar residues</b>                                                            |
| <i>wCTP(Z1)_NO_PLR_N1</i>      | Topology of <b>polar residues</b> represented by their hydrophobic properties                                                  |
| <i>wCTP(ISA)_NO_PCR_Ar</i>     | Topology of <b>positive-charged residues</b> represented with their non-polar areas                                            |
| <i>wCTP(IP)_NO_ARG_Q2</i>      | Topology of <b>Arg</b> residues represented with the isoelectric point.                                                        |

**Table SI-13.** Detailed information about the benchmark annotation dataset and the prediction performed for each method/protein. Misclassified cases are highlighted in red font

| Locus Id | Function                                                                                        | Benchmark Annotation | EzyPred              | EnzymeDetector               | ProtDCal |
|----------|-------------------------------------------------------------------------------------------------|----------------------|----------------------|------------------------------|----------|
| SO_0342  | prpF protein required for repair/synthesis of Fe-S center of AcnD<br><i>PubMed ID: 14702315</i> | Non-Enz              | Non-Enz              | Non-detected                 | Enz      |
| SO_0506  | 3-octaprenyl-4-hydroxybenzoate Decarboxylase UbiD<br><i>PubMed ID: 782527</i>                   | Enz                  | Non-Enz              | <b>Enz class</b> (4.1.1.-)   | Enz      |
| SO_0887  | Peptidylarginine deiminase<br><i>PubMed ID: 10377098</i>                                        | Enz                  | <b>Enz</b> (3.5.-.-) | <b>Enz class</b> (3.5.3.12)  | Enz      |
| SO_1313  | Anhydro-N-acetylmuramic acid kinase<br><i>PubMed ID: 15901686</i>                               | Enz                  | Non-Enz              | <b>Enz class</b> (2.7.1.170) | Enz      |
| SO_1523  | NAD kinase<br><i>PubMed ID: 11488932</i>                                                        | Enz                  | <b>Enz</b> (2.7.-.-) | <b>Enz class</b> (2.7.1.23)  | Enz      |
| SO_1597  | Omega-3 polyunsaturated fatty acid synthase PfaD subunit<br><i>PubMed ID: 12055309</i>          | Enz                  | Non-Enz              | <b>Enz class</b> (1.3.1.9)   | Enz      |
| SO_1608  | 7-cyano-7-eazaguanine reductase<br><i>PubMed ID: 15767583</i>                                   | Enz                  | <b>Enz</b> (3.5.-.-) | <b>Enz class</b> (1.7.1.13)  | Enz      |
| SO_1789  | UDP-2,3-diacetylglucosamine hydrolase<br><i>PubMed ID: 12000770</i>                             | Enz                  | Non-Enz              | <b>Enz class</b> (3.6.1.54)  | Enz      |
| SO_1851  | Methyltransferase<br><i>PubMed ID: 17010378</i>                                                 | Enz                  | Non-Enz              | <b>Enz class</b> (2.1.1.173) | Enz      |
| SO_1963  | Homogenetisate 1,2-dioxygenase<br><i>PubMed ID: 10876237</i>                                    | Enz                  | Non-Enz              | <b>Enz class</b> (1.13.11.5) | Enz      |
| SO_2042  | Sulfite oxidase subunit YedY<br><i>PubMed ID: 15355966</i>                                      | Enz                  | <b>Enz</b> (1.7.-.-) | <b>Enz class</b> (1.8.-.-)   | Enz      |
| SO_2043  | Sulfite oxidase subunit yedZ<br><i>PubMed ID: 16042411</i>                                      | Non-Enz              | Non-Enz              | Non-detected                 | Enz      |
| SO_2593  | NAD-specific glutamate dehydrogenase<br><i>PubMed ID: 10924516</i>                              | Enz                  | Non-Enz              | <b>Enz class</b> (1.4.1.2)   | Enz      |
| SO_2603  | Methionine- $\alpha$ -sulfoxide reductase<br><i>PubMed ID: 17535911</i>                         | Enz                  | Non-Enz              | <b>Enz class</b> (1.8.4.14)  | Enz      |
| SO_2614  | Aminodeoxychorismate lyase<br><i>PubMed ID: 11011151</i>                                        | Enz                  | Non-Enz              | Non-detected                 | Enz      |
| SO_2627  | ATP-dependent Clp protease adaptor protein ClpS<br><i>PubMed ID: 11931773</i>                   | Non-Enz              | Non-Enz              | Non-detected                 | Non-Enz  |

|         |                                                                                             |         |                         |                                 |         |
|---------|---------------------------------------------------------------------------------------------|---------|-------------------------|---------------------------------|---------|
| SO_3014 | Chromosome segregation and condensation protein B<br><i>PubMed ID: 12100548</i>             | Non-Enz | Non-Enz                 | Non-detected                    | Enz     |
| SO_3015 | Chromosome segregation and condensation protein A<br><i>PubMed ID: 12100548</i>             | Non-Enz | Non-Enz                 | Non-detected                    | Enz     |
| SO_3367 | tRNA guanine-N(7)-methyltransferase<br><i>PubMed ID: 12730187</i>                           | Enz     | <b>Enz</b><br>(2.1.-.-) | <b>Enz class</b><br>(2.1.1.33)  | Enz     |
| SO_3436 | tRNA pseudouridine synthase TruD<br><i>PubMed ID: 12756329</i>                              | Enz     | Non-Enz                 | <b>Enz class</b><br>(5.4.99.27) | Enz     |
| SO_3542 | Phosphoketolase<br><i>PubMed ID: 16086247</i>                                               | Enz     | Enz<br>(4.9.-.-)        | <b>Enz class</b><br>(4.1.2.9)   | Enz     |
| SO_3578 | Multicopper polyphenol oxidase (laccase)<br><i>PubMed ID: 16740638</i>                      | Enz     | Non-Enz                 | Non-detected                    | Enz     |
| SO_3667 | Heme iron utilization protein HugZ<br><i>PubMed ID: 16376031</i>                            | Non-Enz | Non-Enz                 | Non-detected                    | Enz     |
| SO_3668 | Heme iron utilization protein HugX<br><i>PubMed ID: 16376031</i>                            | Non-Enz | Non-Enz                 | Non-detected                    | Enz     |
| SO_3957 | 3-deoxy-D-manno-octulosonate 8-phosphate phosphatase<br><i>PubMed ID: 12639950</i>          | Enz     | Enz<br>(3.6.-.-)        | <b>Enz class</b><br>(3.1.3.45)  | Enz     |
| SO_4227 | S-adenosylmethionine-dependent methyltransferase MraW<br><i>PubMed ID: 10572301</i>         | Enz     | Non-Enz                 | <b>Enz class</b><br>(2.1.1.199) | Enz     |
| SO_4398 | D-tyrosyl-tRNA deacylase<br><i>PubMed ID: 10383414</i>                                      | Enz     | Non-Enz                 | <b>Enz class</b><br>(3.1.-.-)   | Non-Enz |
| SO_4413 | Kynureninase<br><i>PubMed ID: 9264543</i>                                                   | Enz     | Enz<br>(2.8.-.-)        | <b>Enz class</b><br>(3.7.1.3)   | Enz     |
| SO_4677 | 3-deoxy-D-manno-octulosonic-acid kinase<br><i>PubMed ID: 10531340</i>                       | Enz     | Non-Enz                 | <b>Enz class</b><br>(2.7.1.-)   | Enz     |
| SO_4680 | CDP-glycerol poly(glycerophosphate) Glycerophosphotransferase<br><i>PubMed ID: 10648531</i> | Enz     | Enz<br>(2.7.-.-)        | Non-detected                    | Enz     |

## References

1. Kamide, K. and Dobashi, T. (2000), *Physical Chemistry of Polymer Solutions. Theoretical Background*. Elsevier Science.
2. Ruiz-Blanco, Y.B., García, Y., Sotomayor-Torres, C.M. and Marrero-Ponce, Y. (2010) New Set of 2D/3D Thermodynamic Indices for Proteins. A Formalism Based on “Molten Globule” Theory. *Physics Procedia*, **8**, 63-72.

3. Ruiz-Blanco, Y.B., Marrero-Ponce, Y., Paz, W., García, Y. and Salgado, J. (2013) Global Stability of Protein Folding from an Empirical Free Energy Function. *Journal of Theoretical Biology*, **321**, 44-53.
4. Jiang, L., Kuhlman, B., Kortemme, T. and Baker, D. (2005) A “solvated rotamer” approach to modeling water-mediated hydrogen bonds at protein–protein interfaces. *PROTEINS: Structure, Function, and Bioinformatics*, **58**, 893–904.
5. Kyte, J. and Doolittle, R.F. (1982) A Simple Method for Displaying the Hydrophobic Character of a Protein. *J. Mol. Biol.*, **157**, 105-132.
6. Collantes, E.R. and Dunn-III, W.J. (1995) Amino acid side chain descriptors for quantitative structure-activity relationship studies of peptide analogues. *J. Med. Chem.*, **38**, 2705-2713.
7. Plaxco, K.W., Simons, K.T. and Baker, D. (1998) Contact Order, Transition State Placement and the Refolding Rates of Single Domain Proteins. *J. Mol. Biol.*, **277**, 985-994.
8. Burrage, J.S.a.K. (2006) Predicting residue-wise contact orders in proteins by support vector regression. *BMC Bioinformatics*, **425**.
9. Nolting, B., Schalike, W., Hampel, P., Grundig, F., Gantert, S., Sips, N., Bandlow, W. and Qi, P.X. (2003) Structural determinants of the rate of protein folding. *J. Theor. Biol.*, **223**, 299–307.
10. Micheletti, C. (2003) Prediction of Folding Rates and Transition-State Placement From Native-State Geometry. *PROTEINS: Structure, Function, and Genetics*, **51**, 74–84.
11. Zhou, H. and Zhou, Y. (2002) Folding Rate Prediction Using Total Contact Distance. *Biophysical Journal*, **82**, 458–463.
12. Lehninger. (2005), *Biochemistry*, pp. 76-115.
13. Zamyatin, A.A. (1972) Protein Volume in Solution. *Prog. Biophys. Mol. Biol.*, **24**, 107-123.
14. Hellberg S., S., M., Skagerberg B., Wold, S. (1987) Peptide Quantitative Structure-Activity Relationship, a Multivariate Approach. *J. Med. Chem*, **30**, 1126-1135. .
15. Levitt, M. (1978) Conformational Preferences of Amino Acids in Globular Proteins. *Biochemistry*, **17**.
